17. Cohn PH: Clinical Cardiovascular Physiology, Clinical Indices of Ventricular Function, 1st edition. Edited by Cohn PH. Philadelphia, W.B. Saunders, 1985, pp 105–27
18. Shaffer JE, Quon CY, Gorczynski RJ:  $\beta$ -Adrenoreceptor antagonist potency and pharmacodynamics of ASL-8123, the primary acid metabolite of esmolol. *J Cardiovasc Pharmacol* 1988; 11:187–92
19. Conway WD, Minatoya H, Lands AM, Shekosky JM: Absorption and elimination profile of isoproterenol. 3. The metabolic fate of dl-isoproterenol-7- $^3$ H in the dog. *J Pharm Sci* 1968; 57:1135–41
20. Fallouh HB, Bardswell SC, McLatchie LM, Shattock MJ, Chambers DJ, Kentish JC: Esmolol cardioplegia: The cellular mechanism of diastolic arrest. *Cardiovasc Res* 2010; 87:552–60
21. Reilly CS, Wood M, Koshakji RP, Wood AJ: Ultra-short-acting  $\beta$ -blockade: A comparison with conventional  $\beta$ -blockade. *Clin Pharmacol Ther* 1985; 38:579–85
22. Manzo A, Ootaki Y, Ootaki C, Kamohara K, Fukamachi K: Comparative study of heart rate variability between healthy human subjects and healthy dogs, rabbits and calves. *Lab Anim* 2009; 43:41–5
23. Deegan R, Wood AJ:  $\beta$ -Receptor antagonism does not fully explain esmolol-induced hypotension. *Clin Pharmacol Ther* 1994; 56:223–8
24. Yu SK, Tait G, Karkouti K, Wijesundera D, McCluskey S, Beattie WS: The safety of perioperative esmolol: A systematic review and meta-analysis of randomized controlled trials. *Anesth Analg* 2011; 112:267–81
25. BREVIBLOC (package insert). Deerfield, Baxter Healthcare, 2012
26. Quon CY, Gorczynski RJ: Pharmacodynamics and onset of action of esmolol in anesthetized dogs. *J Pharmacol Exp Ther* 1986; 237:912–8
27. Manders WT, Vatner SF: Effects of sodium pentobarbital anesthesia on left ventricular function and distribution of cardiac output in dogs, with particular reference to the mechanism for tachycardia. *Circ Res* 1976; 39:512–7

## ANESTHESIOLOGY REFLECTIONS FROM THE WOOD LIBRARY-MUSEUM

### The Bullet Oscilloscope: The ORM-1 of “E for M”

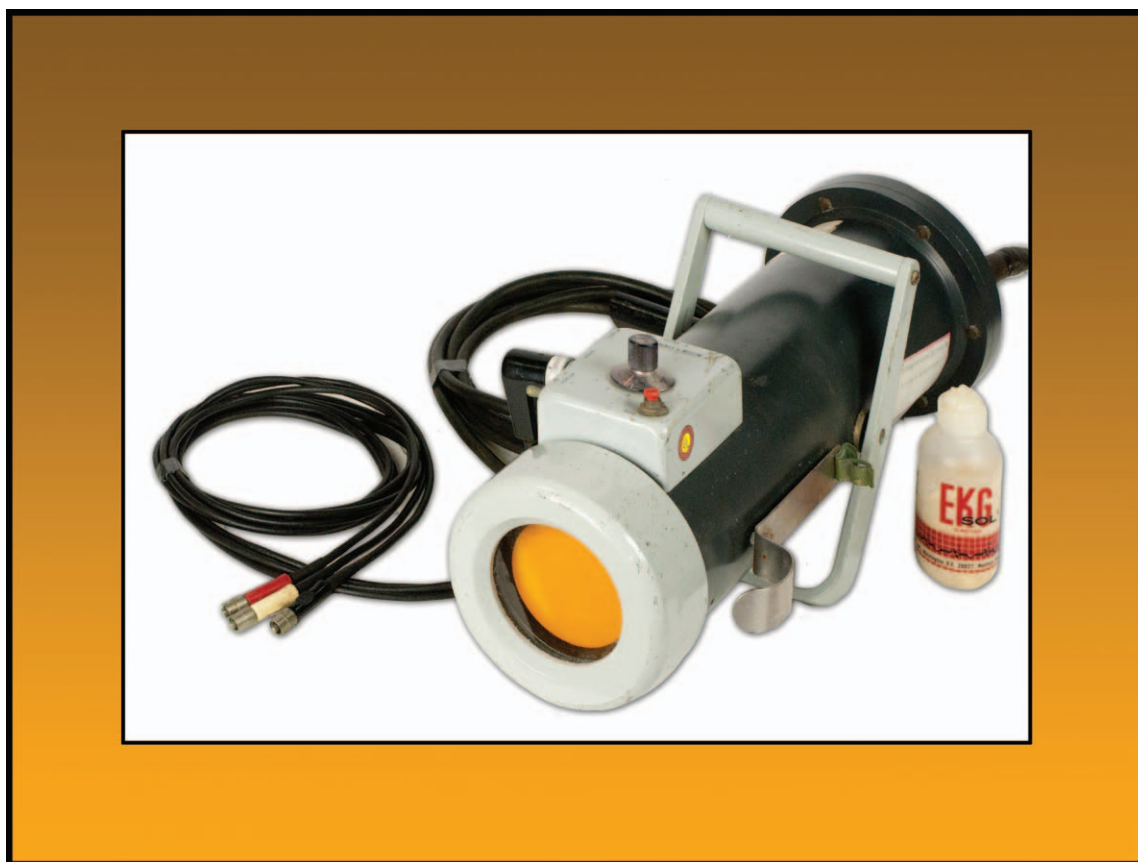

Early efforts to display an anesthetic patient's electrocardiogram (ECG or EKG) on cathode screens were hazardous. Because of the risk of igniting flammable anesthetic vapors, the Operating Room Monitor (ORM-1, above) shielded the monitoring device electrically, thereby minimizing risks of fires or explosions. Due to its elongated shape, the ORM-1 was fondly known in the 1960s by many anesthesiologists as a “bullet” oscilloscope. The original Westchester, New York, manufacturer of the ORM-1, Electronics for Medicine (“E for M”), was eventually absorbed by Honeywell, and then acquired by PPG Industries, before disappearing entirely from the corporate landscape. (Copyright © the American Society of Anesthesiologists, Inc.)

George S. Bause, M.D., M.P.H., Honorary Curator, ASA's Wood Library-Museum of Anesthesiology, Schaumburg, Illinois, and Clinical Associate Professor, Case Western Reserve University, Cleveland, Ohio. UJYC@aol.com.
